# Supplementary material for: Eosinophil as a biomarker for diagnosis, prediction, and prognosis evaluation of severe checkpoint inhibitor pneumonitis
Source: PubMed Central journal article supplement (PMC9413068; doi:10.3389/fonc.2022.827199), 2022-08-12

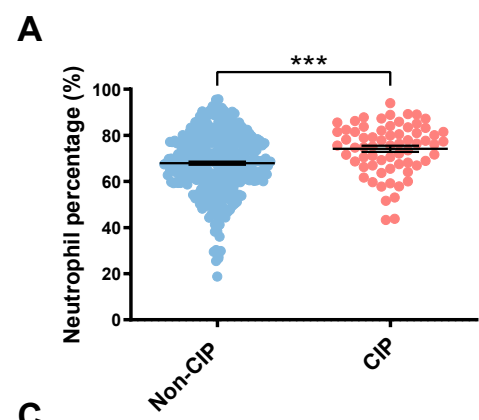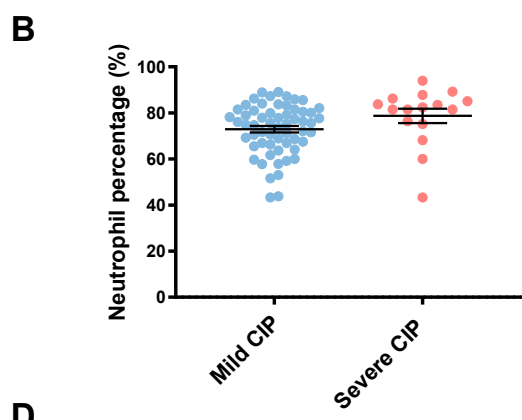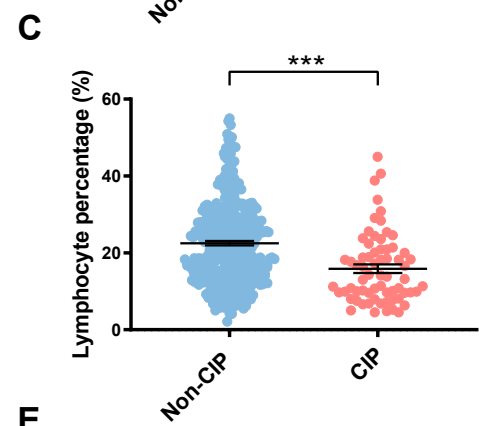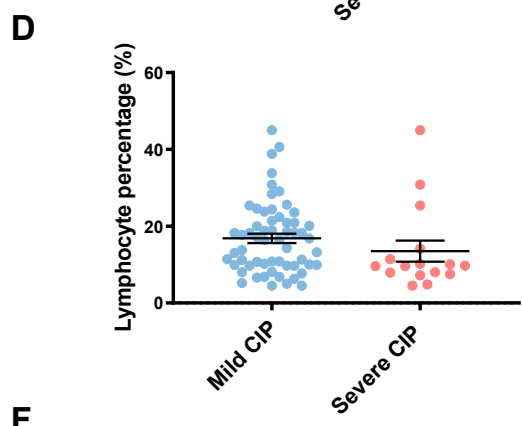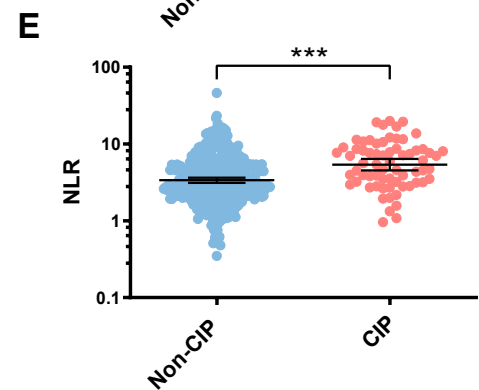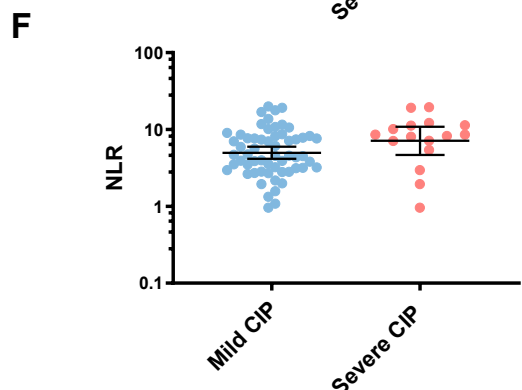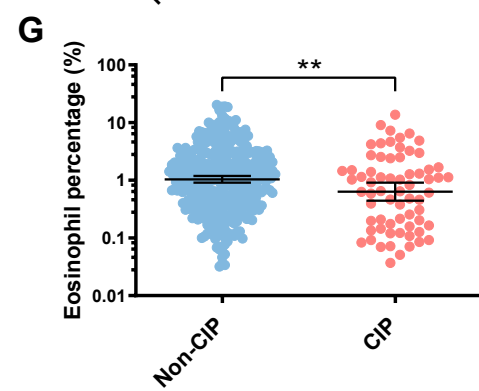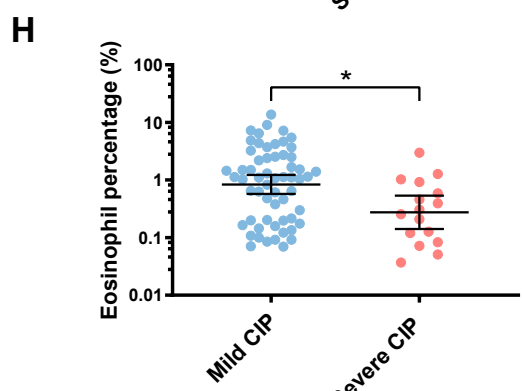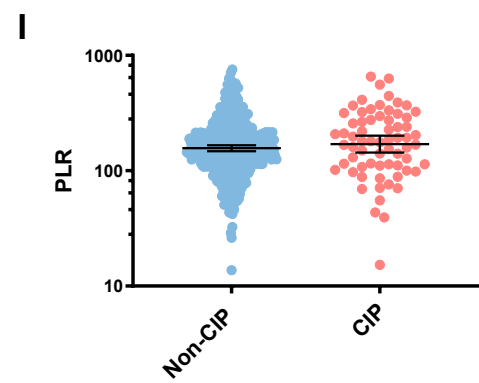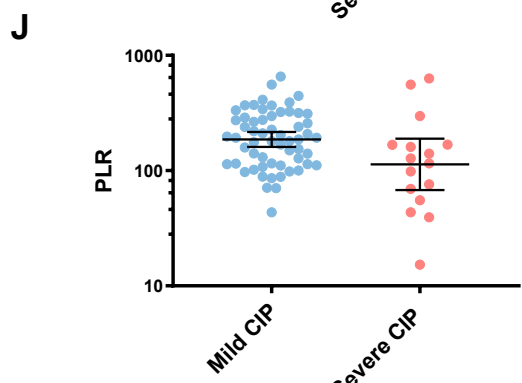

Supplement: Image_1.pdf [file Image_1.pdf]
