# Supplementary material for: Eosinophil as a biomarker for diagnosis, prediction, and prognosis evaluation of severe checkpoint inhibitor pneumonitis
Source: PubMed Central journal article supplement (PMC9413068; doi:10.3389/fonc.2022.827199), 2022-08-12

**A**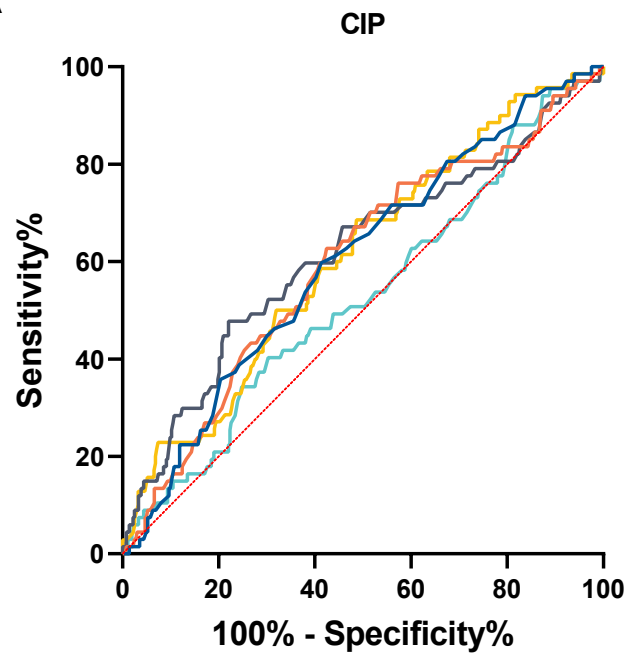**B**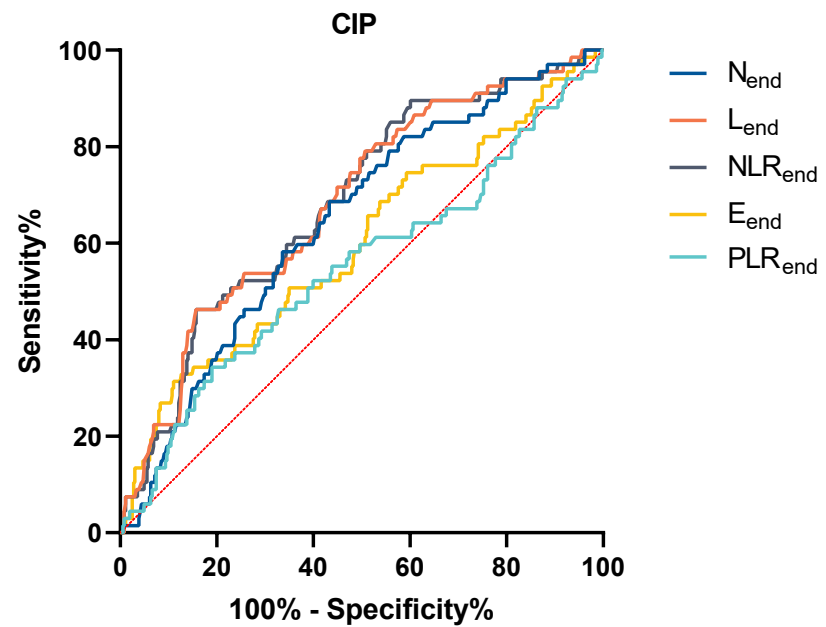**C**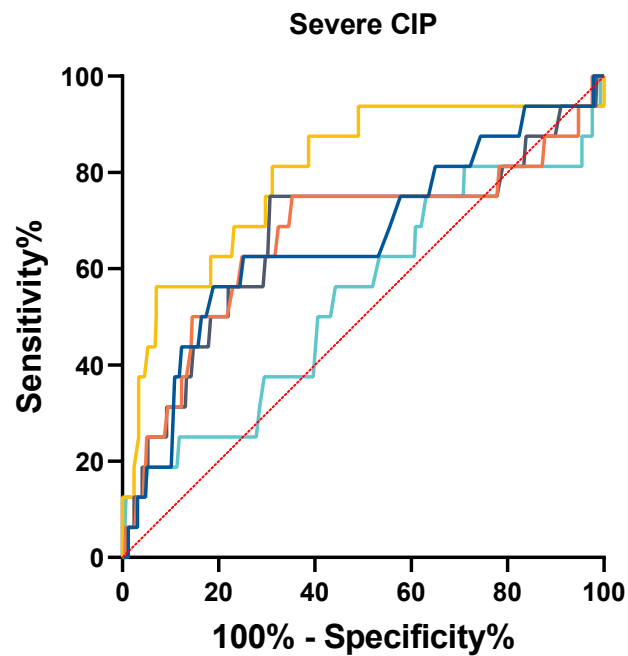**D**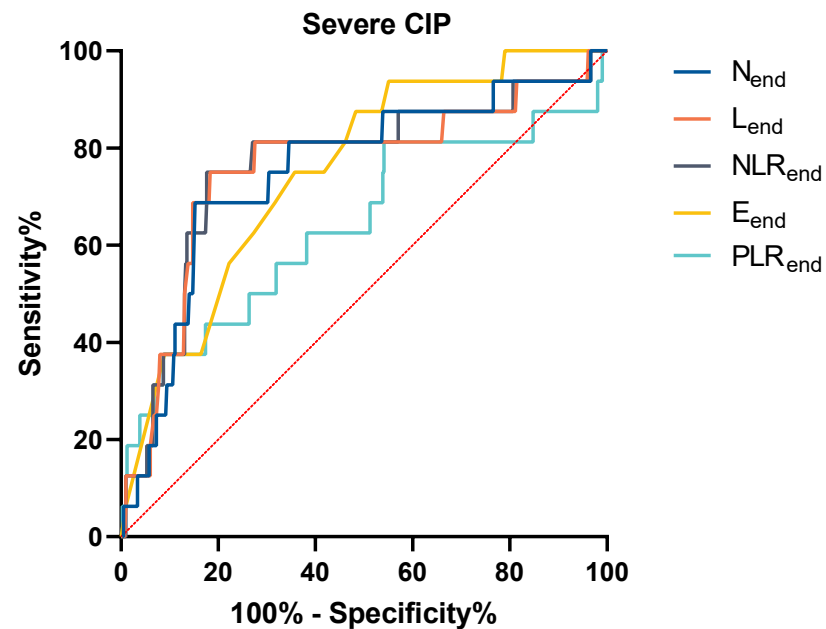

Supplement: Image_3.pdf [file Image_3.pdf]
